# Supplementary material
Source: publisher figshare collection journal article supplement (https://tandf.figshare.com/articles/dataset/_/3581244)
Supplement: Supplementary file 1 [file 1]

Figure S2

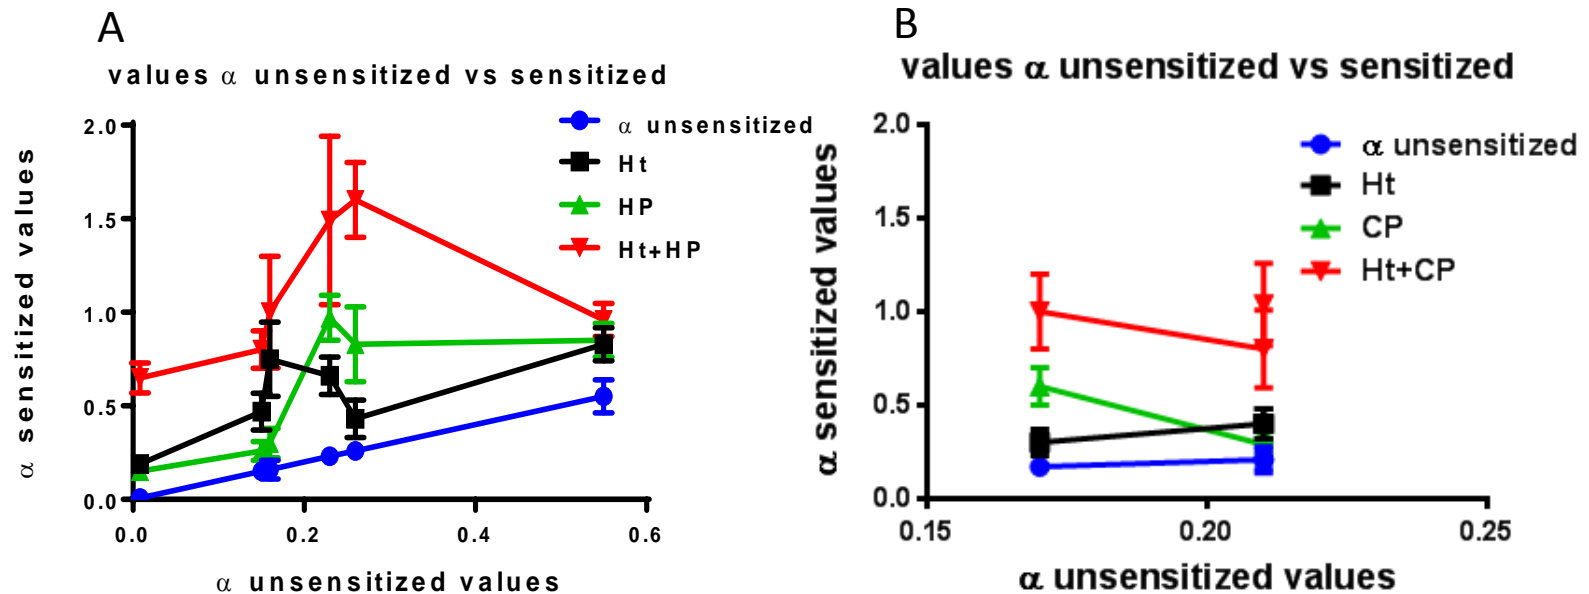

Figure S2. Sensitized  $\alpha$  values plotted against the unsensitized  $\alpha$  values. Sensitization was obtained with hyperthermia (Ht), halogenated pyrimidine (HP) and the combination of Ht and HP in several cell lines (A) with Ht, Cp and Ht+CP (B). Each experiment was performed at least 3 times. Error bars are s.d.
