# Supplementary material
Source: publisher figshare collection journal article supplement (https://tandf.figshare.com/articles/dataset/_/3581244)
Supplement: Supplementary file 2 [file 1]

Archive with 2 entries (2 files):
- fig S1 ms franken.pdf
- fig S2 ms franken.pdf
