# Supplementary material
Source: publisher figshare collection journal article supplement (https://tandf.figshare.com/articles/dataset/_/3581244)
Supplement: Supplementary file 2 [file 1 › fig S1 ms franken.pdf]

Figure S1

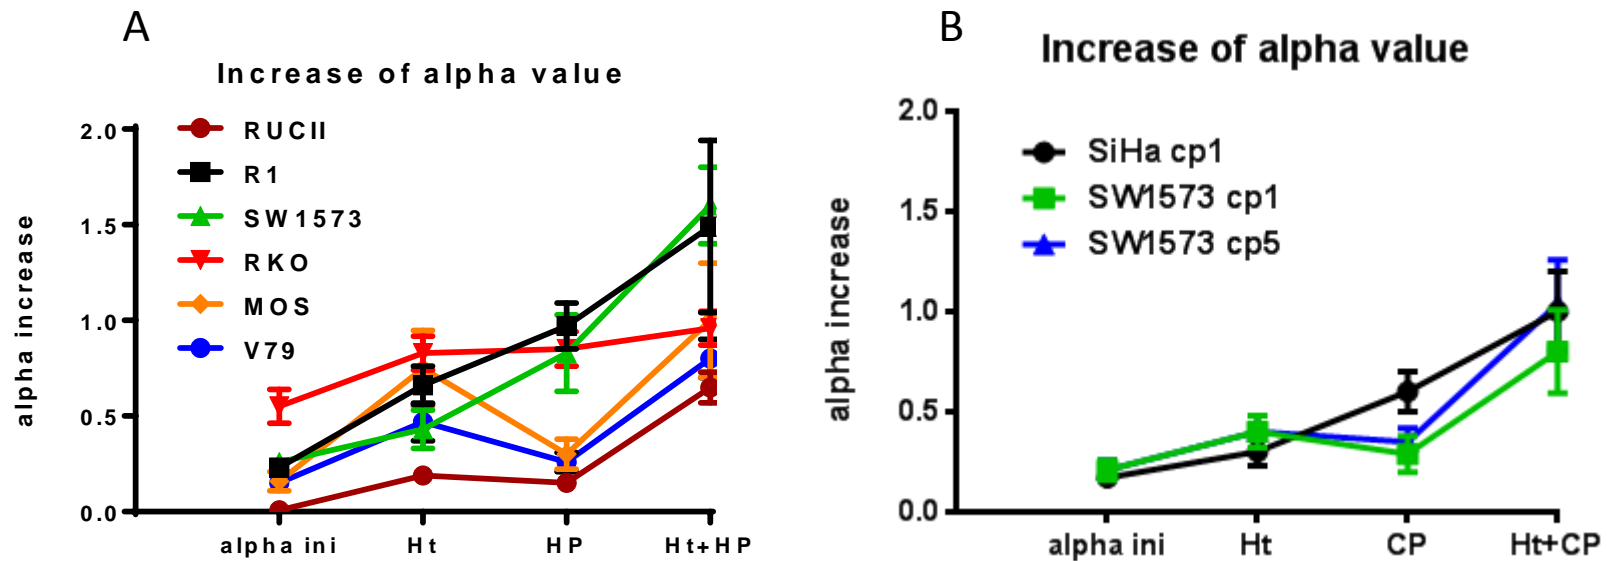

Figure S1. Increase of the initial value of the linear parameter,  $\alpha$ , after sensitization with hyperthermia (Ht), halogenated pyrimidine (HP) and the combination of Ht and HP in several cell lines (A) and increase of the initial value of the linear parameter,  $\alpha$ , after sensitization with hyperthermia (Ht), cisplatin (CP) and the combination of Ht and CP (B). Each experiment was performed at least 3 times. Error bars are s.d. The temperatures used are indicated in figures 1-3. Cp1 and cp5 means 1  $\mu$ M and 5  $\mu$ M respectively.
